# Supplementary material
Source: Springer Nature journal article supplement (https://www.springermedizin.de/resource/supplementary/12889_2007_1031_MOESM6_ESM.pdf/9503174)

a)

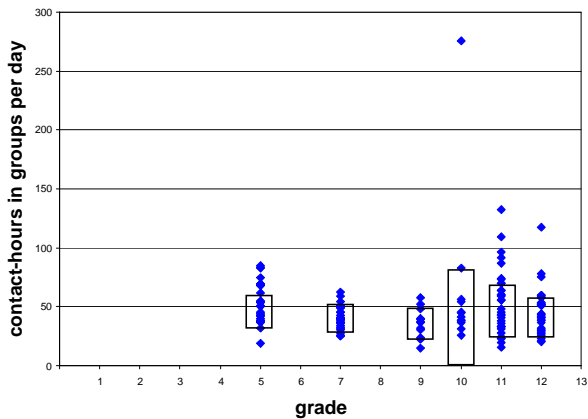

b)

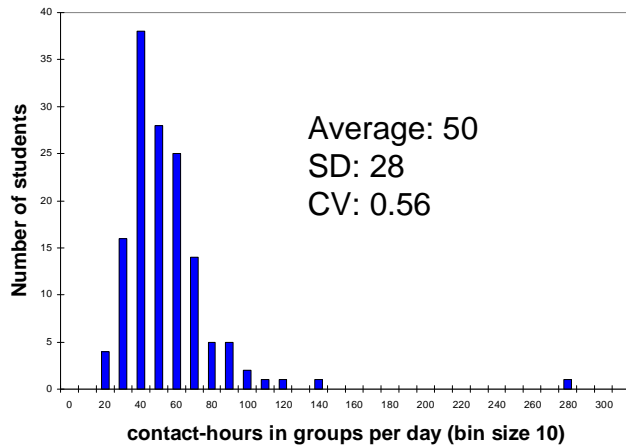

c)

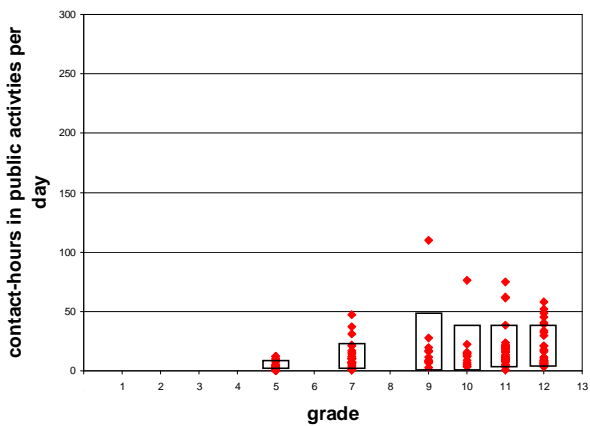

d)

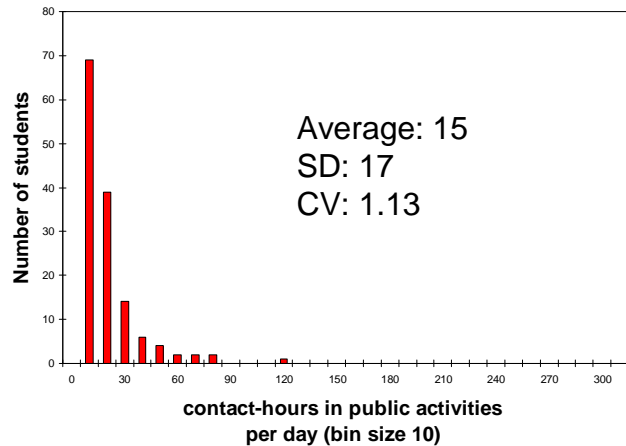

e)

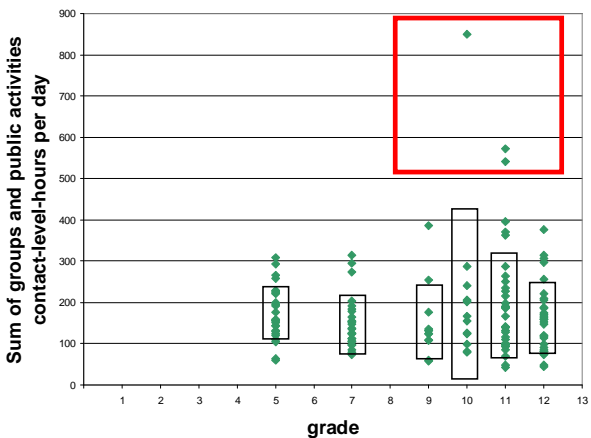

f)

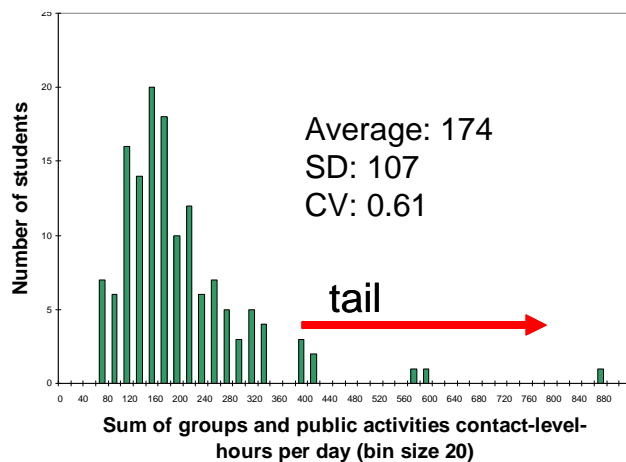

Supplement: MOESM6 [file 9503174]
